# Supplementary material for: Natural Compound 2,2′,4′-Trihydroxychalcone Suppresses T Helper 17 Cell Differentiation and Disease Progression by Inhibiting Retinoid-Related Orphan Receptor Gamma T
Source: MDPI journal article supplement (doi:10.3390/ijms232314547), 2022-11-22
Supplement: s1 [file s1]

## Supplementary Figure 1

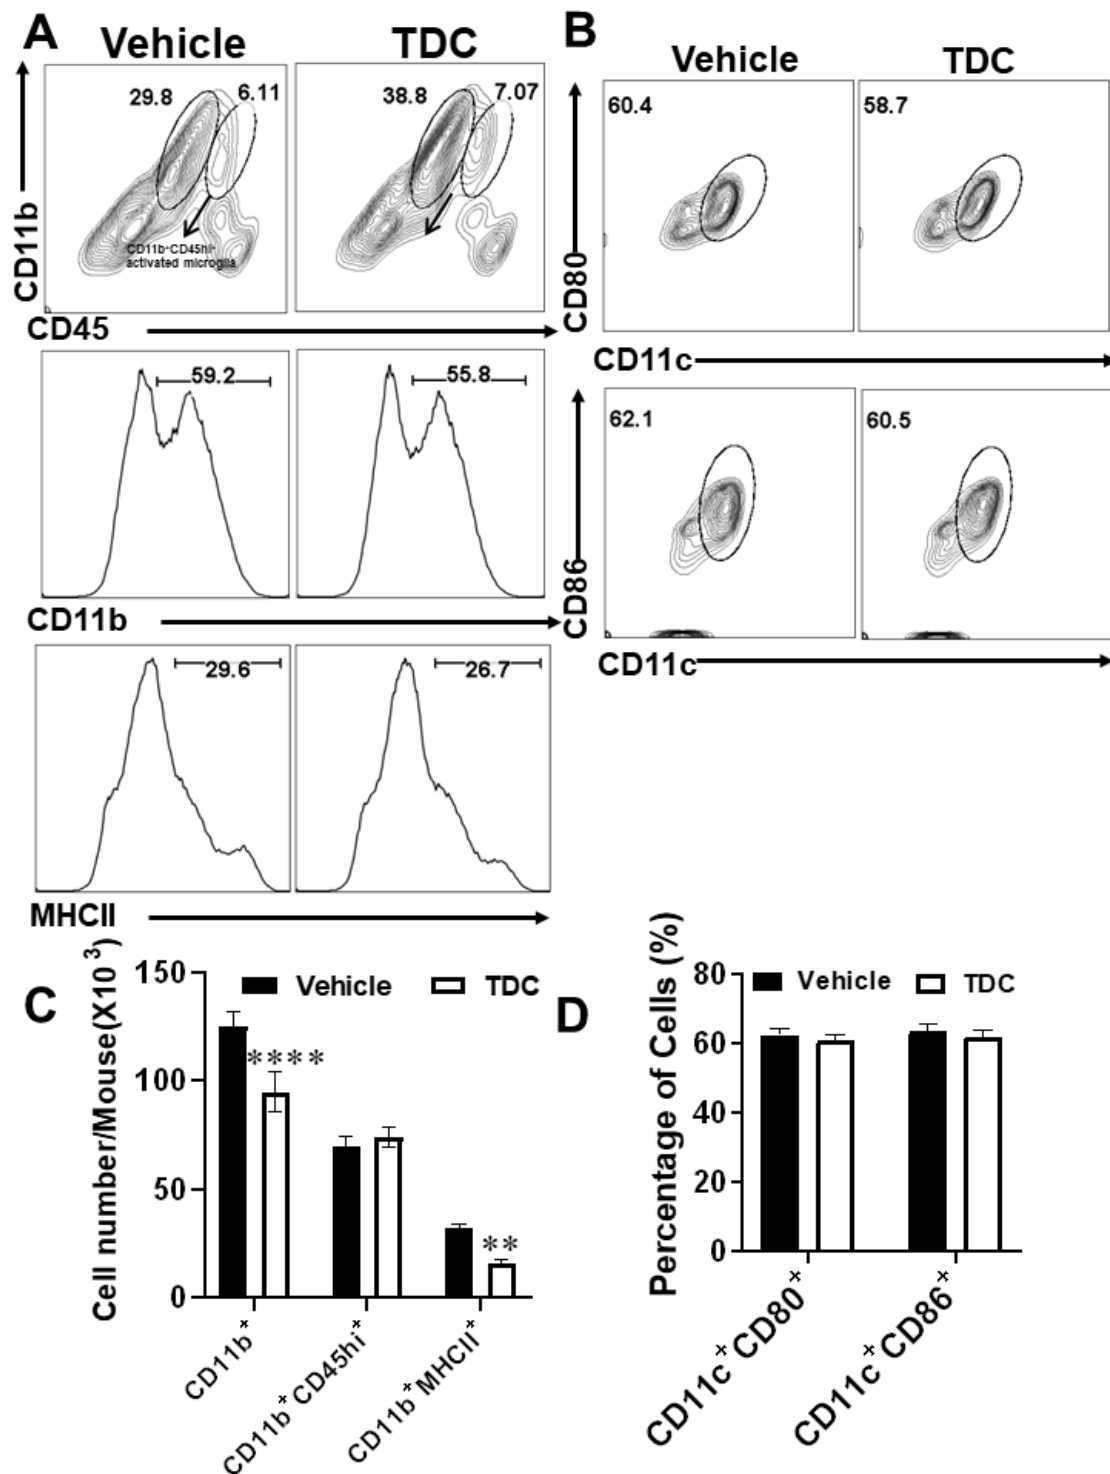

**Supplementary Figure S1. The effect of TDC treatment on the activation of microglia and DCs in central nervous system.** (A) Flow cytometry analysis of activated microglia (CD11b<sup>+</sup> CD45<sup>hi</sup>) CD11b<sup>+</sup> cells and CD11b<sup>+</sup> MHCII<sup>+</sup> cells. (B)

The proportion of CD11c<sup>+</sup> CD80<sup>+</sup> and CD11c<sup>+</sup> CD86<sup>+</sup> cells in CD45<sup>+</sup> gate in CNS. (C)

The statistical results of the proportion of CD11b<sup>+</sup>CD45hi<sup>+</sup>, CD11b<sup>+</sup> and CD11b<sup>+</sup>MHCII<sup>+</sup> cells. (D) The percentage of CD11c<sup>+</sup>CD80<sup>+</sup> and CD11c<sup>+</sup>CD86<sup>+</sup> cells in the CNS was counted. Data are shown as mean  $\pm$  SD ( $n = 6$  mice per group) and are representative of three experiments. \*\*  $P < 0.01$ , \*\*\*\*  $P < 0.0001$ , two-way ANOVA with multiple comparisons test.

## Supplementary Figure 2

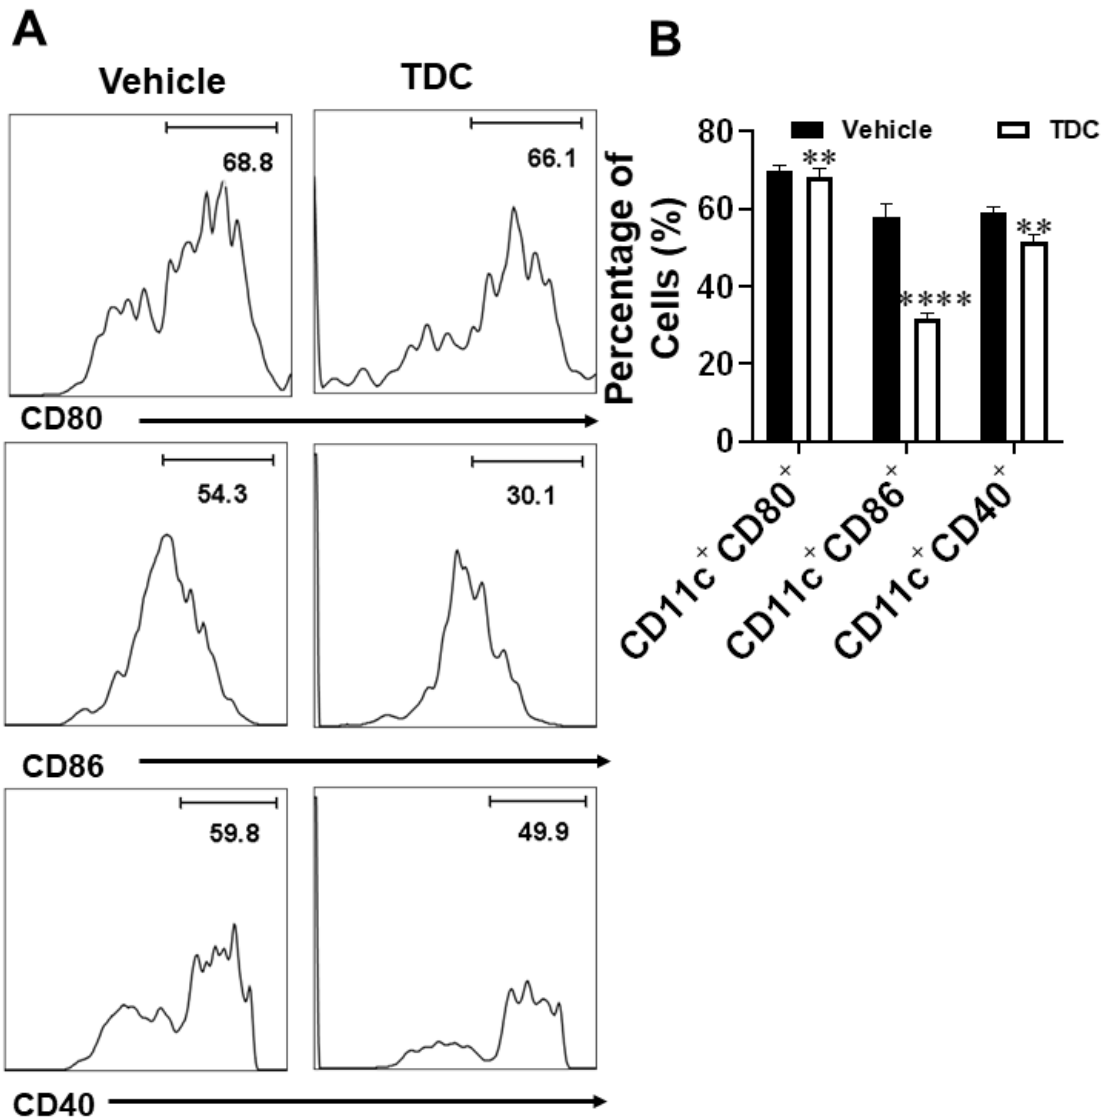

**Supplementary Figure S2. The effects of TDC treatment on DCs in periphery.**

(A) The percentage of CD11c<sup>+</sup> CD80<sup>+</sup>, CD11c<sup>+</sup> CD86<sup>+</sup> and CD11c<sup>+</sup> CD40<sup>+</sup> cells in CD45<sup>+</sup> gate in peripheral nervous systems. (B) The percentage of CD11c<sup>+</sup> CD80<sup>+</sup>,

CD11c<sup>+</sup>CD86<sup>+</sup>, CD11c<sup>+</sup>CD40<sup>+</sup> cells was counted. Data are shown as mean  $\pm$  SD ( $n = 6$  mice per group), \*\*  $P < 0.01$ , \*\*\*\*  $P < 0.0001$ , two-way ANOVA with multiple comparisons test.

**Supplementary Figure 3**

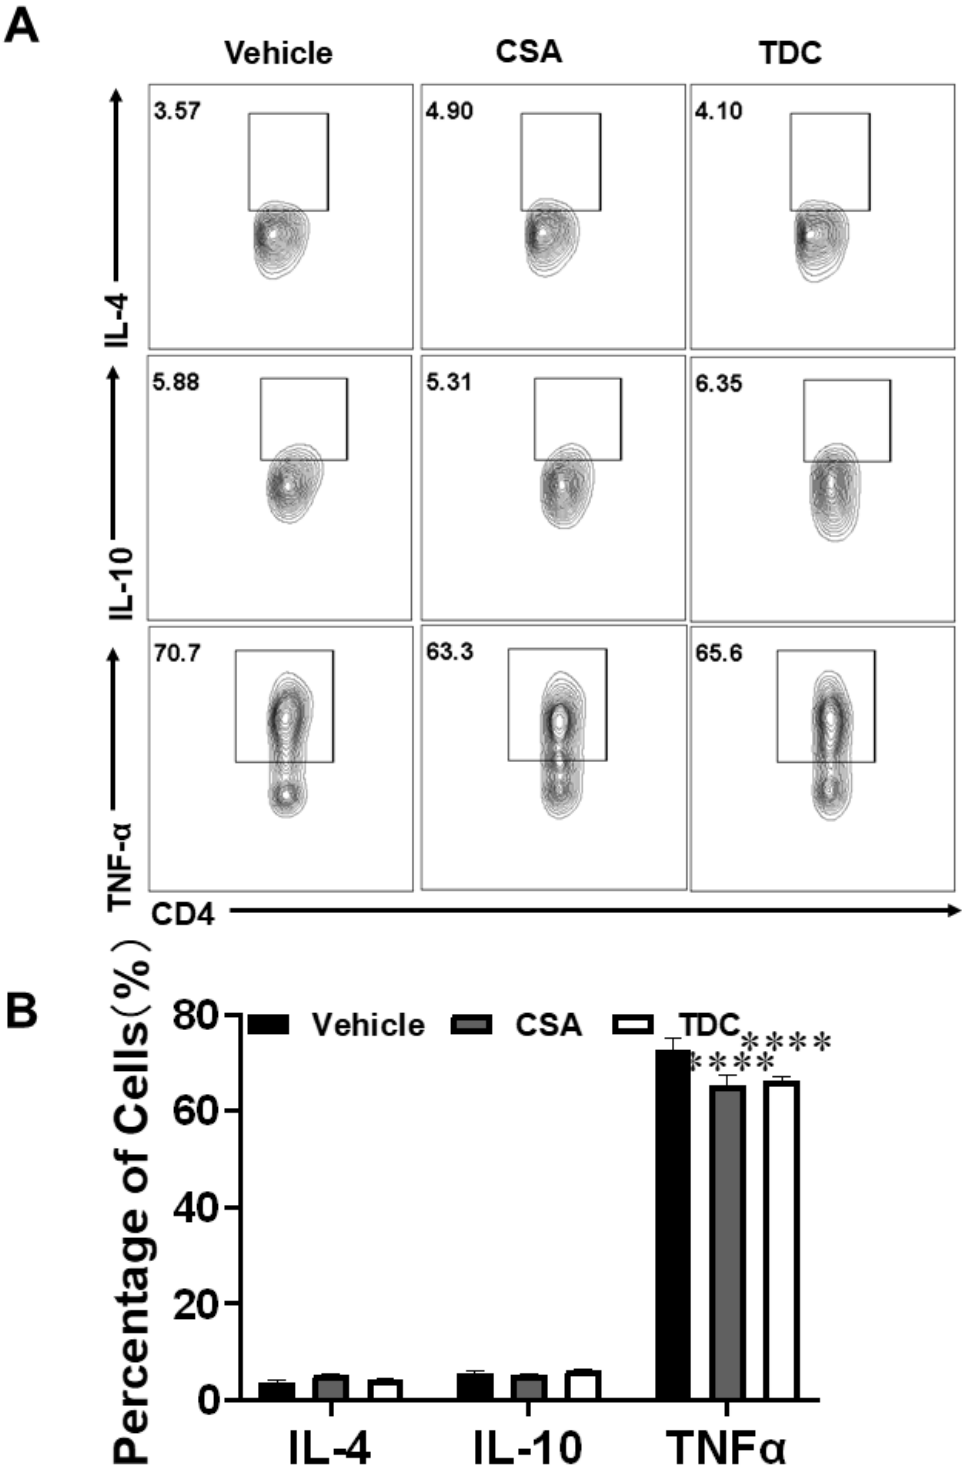

**Supplementary Figure S3. Effects of TDC on T cells in splenocytes of skin transplanted mice.** (A) Flow cytometric pseudo-color image of CD4<sup>+</sup>IL-4<sup>+</sup>, CD4<sup>+</sup>IL-10<sup>+</sup> and CD4<sup>+</sup>TNF- $\alpha$ <sup>+</sup> in splenocyte cells. (B) Statistical comparison of CD4<sup>+</sup>IL-4<sup>+</sup>, CD4<sup>+</sup>IL-10<sup>+</sup> and CD4<sup>+</sup>TNF- $\alpha$ <sup>+</sup> in different groups' splenocytes. Data are presented as mean values  $\pm$  SD and are representative of three experiments ( $n=3$  each group) ,  
\*\*\*\* $P < 0.0001$ , two-way ANOVA with multiple comparisons test.
